# Supplementary material for: Sexual dimorphism, phenotypic integration, and the evolution of head structure in casque‐headed lizards
Source: PubMed Central journal article supplement (PMC5689487; doi:10.1002/ece3.3356), 2017-09-25
Supplement: ECE3-7-8989-s001.pdf [file ECE3-7-8989-s001.pdf]

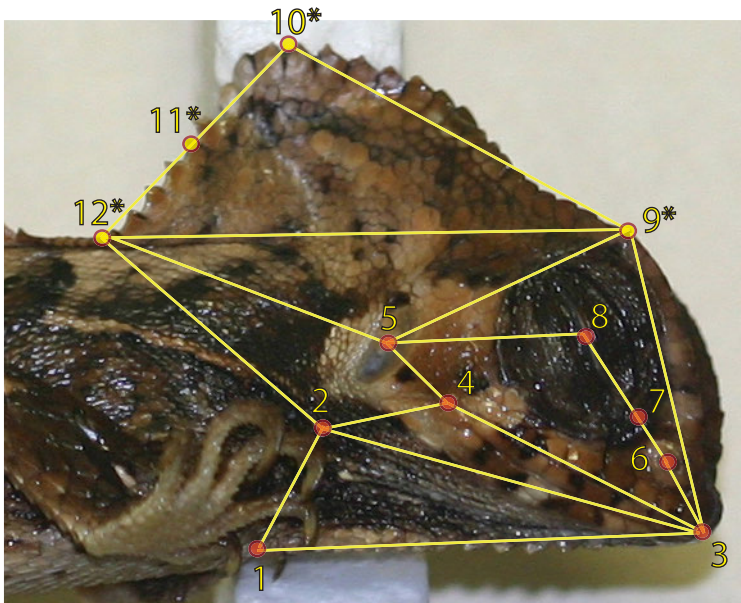

Figure S1
